# Supplementary material for: Peripartum Management of Glycemia in Women With Type 1 Diabetes
Source: Oxford University Press journal article supplement (doi:10.2337/dc13-1348), 2013-10-16

## SUPPLEMENTARY DATA

### Protocol for the peripartum management of T1DM

#### *Induction of labour with prostaglandin E2*

- The usual dose of insulin is administered until in established labour
- An insulin and dextrose/saline infusion is commenced once in established labour
  - Dextrose/saline is administered as 1L 4% dextrose and 0.18% saline at 80mls/hr
  - Insulin is administered as 50 units Actrapid made up to 50mls with 0.9% sodium chloride
- The BGLs are monitored hourly and insulin adjusted to the below protocol
  - The aim is to maintain the BGL between 4-7mmol/L

| BGL (mmol/L) | Insulin infusion (mls/hr)                         |
|--------------|---------------------------------------------------|
| <4           | Discontinue infusion and notify medical registrar |
| 4.1-6        | 1                                                 |
| 6.1-8        | 2                                                 |
| 8.1-10       | 3                                                 |
| >10          | Notify and review by medical registrar            |

#### *Induction of labour with artificial rupture of membranes or syntocinon or caesarean section*

- The usual dose of insulin is administered the night prior
- The patient is fasted from midnight and ceases subcutaneous insulin
- On the morning of the planned induction/caesarean section an insulin and dextrose/saline infusion is commenced and management as above

#### *Presentation in spontaneous labour*

- An insulin and dextrose/saline infusion is commenced on arrival and management as above

#### *Postpartum*

##### Vaginal delivery

- Insulin infusion is ceased on delivery unless the BGL >10mmol/L (discuss with medical team)
- Cease intravenous fluids unless BGL <4mmol/L or unable to tolerate diet (discuss with medical team)

##### Caesarean section

- Insulin infusion is ceased on delivery unless the BGL >10mmol/L (discuss with medical team)
- Continue dextrose/saline infusion 1L q12h until tolerating diet
- Monitor BGL 2<sup>nd</sup> hourly for 8 hrs and then QID
- Recommence insulin if BGL >10mmol/L
  - Subcutaneously if able to tolerate diet
  - IV insulin infusion if still nil by mouth or unable to tolerate diet

## SUPPLEMENTARY DATA

**Supplementary Table 1.** Differences between the peripartum management and glycaemic behaviour of women with multiple pregnancies (2 or 3) during the study period.

|                                                                                        | Mean difference | 95% CI     | P value      |
|----------------------------------------------------------------------------------------|-----------------|------------|--------------|
| Last dose of intermediate or long-acting insulin prior to delivery, hrs                | 9.2             | 4.4, 13.9  | <b>0.002</b> |
| Magnitude of last dose of intermediate or long-acting insulin prior to delivery, units | 20.4            | 8.2, 32.5  | <b>0.004</b> |
| Time to first dose of intermediate or long-acting SC insulin after delivery, hrs       | 15.2            | 6.9, 23.6  | <b>0.002</b> |
| Time to first dose of short or rapid-acting SC insulin after delivery, hrs             | 7.7             | 0.5, 14.8  | <b>0.041</b> |
| Time to first dose of any SC insulin after delivery, hrs                               | 7.2             | 0.4, 14.6  | 0.063        |
| Time to first BGL >8.0mmol/L after delivery, hrs                                       | 11.2            | 0.1, 22.3  | <b>0.043</b> |
| Average daily number of hypoglycaemic episodes from delivery to discharge              | 0.8             | 0.4, 1.2   | <b>0.001</b> |
| Insulin dose recommenced as percentage of pre-pregnancy requirement, %                 | 27.7            | 11.0, 44.4 | <b>0.004</b> |

**Supplementary Table 2.** Insulin treatment pre-pregnancy and at term.

| Insulin at pre-pregnancy          | All women (n=36) | Early requirement for insulin (n=12) | Late requirement for insulin (n=4) | p value |
|-----------------------------------|------------------|--------------------------------------|------------------------------------|---------|
| <i>Insulin dose</i>               |                  |                                      |                                    |         |
| Absolute daily dose, units (SD)   | 52.0 (21.3)      | 57.2 (29.2)                          | 45.3 (13.2)                        | 0.451   |
| Daily dose/kg, units/kg (SD)      | 0.7 (0.2)        | 0.7 (0.3)                            | 0.7 (0.2)                          | 0.927   |
| <i>Basal insulin</i>              |                  |                                      |                                    |         |
| Long-acting*, number (%)          | 17               | 5 (41.7)                             | 4 (100%)                           | 0.089   |
| Intermediate-acting**, number (%) | 16               | 5 (41.7)                             | 0                                  | 0.245   |
| <i>Bolus insulin</i>              |                  |                                      |                                    |         |
| Rapid-acting***, number (%)       | 32               | 12 (100.0)                           | 3 (75.0)                           | 0.250   |
| Short-acting, number**** (%)      | 4                | 0                                    | 1 (25.0)                           | 0.250   |
| <b>Insulin at term</b>            |                  |                                      |                                    |         |
| <i>Insulin dose</i>               |                  |                                      |                                    |         |
| Absolute daily dose, units (SD)   | 91.8 (35.5)      | 96.1 (46.0)                          | 72.5 (40.6)                        | 0.384   |
| Daily dose/kg, units/kg (SD)      | 1.1 (0.4)        | 1.0 (0.5)                            | 0.9 (0.5)                          | 0.747   |
| <i>Basal insulin</i>              |                  |                                      |                                    |         |
| Long-acting*, number (%)          | 20               | 7 (58.3)                             | 3 (75.0)                           | 1.000   |
| Intermediate-acting**, number (%) | 13               | 2 (16.7)                             | 1 (25.0)                           | 1.000   |
| <i>Bolus insulin</i>              |                  |                                      |                                    |         |
| Rapid-acting***, number (%)       | 33               | 12 (100.0)                           | 3 (75.0)                           | 0.250   |
| Short-acting****, number (%)      | 3                | 0                                    | 1 (25.0)                           | 0.250   |

\*insulin glargine, insulin detemir, insulin zinc

\*\*isophane insulin, isophane (NPH)

\*\*\*insulin aspart, insulin lispro

\*\*\*\*insulin neutral (regular)

## SUPPLEMENTARY DATA

**Supplementary Table 3.** Multiple regression analysis with dependent variable time to first dose of any subcutaneous insulin (all pregnancies)

| Independent variables                                                      | Beta   | P     |
|----------------------------------------------------------------------------|--------|-------|
| Insulin infusion postpartum                                                |        |       |
| Time from last dose of long- or intermediate-acting insulin until delivery |        |       |
| Duration of diabetes                                                       | 0.071  | 0.728 |
| BMI at term                                                                | -0.235 | 0.281 |
| Creatinine at term                                                         | 0.418  | 0.102 |
| Mode of delivery                                                           | -0.232 | 0.222 |
| Peripartum steroids                                                        | -0.155 | 0.406 |
| Dose of long- or intermediate-acting insulin                               | 0.243  | 0.207 |
|                                                                            |        |       |
| Maternal hypertensive disorders                                            | -0.088 | 0.748 |
| Time to first oral intake                                                  | 0.049  | 0.819 |

Adjusted R square 0.273, F=2.315, p=0.043

# SUPPLEMENTARY DATA

**Supplementary Table 4.** Characteristics of patients not requiring insulin for >12 hours after delivery.

| <b>Pre-pregnancy characteristics</b>                                                   | Patient 1                                      | Patient 2                                | Patient 3                    | Patient 4                                         |
|----------------------------------------------------------------------------------------|------------------------------------------------|------------------------------------------|------------------------------|---------------------------------------------------|
| Maternal age in years                                                                  | 25                                             | 22                                       | 29                           | 26                                                |
| BMI at pre-pregnancy                                                                   | 27                                             | 20.3                                     | 23.1                         | 23.8                                              |
| Duration diabetes in years                                                             | 7                                              | 3                                        | 18                           | 24                                                |
| Gravida, Parity                                                                        | 1, 0                                           | 4, 1                                     | 1, 0                         | 1, 0                                              |
| HbA1c at diagnosis, %                                                                  | 8.2                                            | 7.6                                      | 6.4                          | 6.5                                               |
| Hba1c at diagnosis, mmol/mol                                                           | 66.1                                           | 59.6                                     | 46.4                         | 47.5                                              |
| Microvascular disease                                                                  | No                                             | No                                       | Yes                          | Yes                                               |
| <b>Pregnancy characteristics</b>                                                       |                                                |                                          |                              |                                                   |
| Weight gain at term, kg                                                                | 17                                             | 10.5                                     | 17                           | 9                                                 |
| HbA1c at term, %                                                                       | 8.0                                            | 7.7                                      | 5.3                          | 6.5                                               |
| HbA1c at term, mmol/mol                                                                | 63.9                                           | 60.7                                     | 34.4                         | 47.5                                              |
| Change in HbA1c at term, %                                                             | -0.2                                           | 0.1                                      | -1.1                         | 0                                                 |
| <b>Delivery characteristics</b>                                                        |                                                |                                          |                              |                                                   |
| Gestation at delivery                                                                  | 37+2                                           | 35+6                                     | 28+5                         | 32+4                                              |
| Betamethasone within 72hrs of delivery                                                 | No                                             | No                                       | No                           | Yes                                               |
| Mode of delivery                                                                       | Emergency caesarean section (fetal indication) | Induction of labour and vaginal delivery | Spontaneous vaginal delivery | Emergency caesarean section (maternal indication) |
| Maternal complications                                                                 | Pre-eclampsia                                  | Nil                                      | Nil                          | Hypertension                                      |
| <b>Peripartum insulin/glycaemia</b>                                                    |                                                |                                          |                              |                                                   |
| Last dose of intermediate or long-acting insulin prior to delivery, hrs                | 12                                             | 18                                       | 17                           | 17                                                |
| Magnitude of last dose of intermediate or long-acting insulin prior to delivery, units | 30                                             | 22                                       | 18                           | 7                                                 |
| Form of intermediate or long-acting insulin administered prior to delivery             | Insulin glargine                               | Isophane insulin                         | Insulin glargine             | Insulin glargine                                  |
| Insulin infusion peripartum                                                            | Yes                                            | Yes                                      | Yes                          | Yes                                               |
| Insulin infusion ceased at delivery                                                    | Yes                                            | Yes                                      | Yes                          | Yes                                               |
| Time to first dose of intermediate or long-acting SC insulin after delivery, hrs       | 13                                             | 35                                       | 29                           | 31                                                |
| Time to first dose of short or rapid-acting SC insulin after delivery, hrs             | 13                                             | 18                                       | 27.5                         | 28                                                |
| Time to first oral intake after delivery, hrs                                          | 5                                              | 4                                        | 3                            | 7                                                 |

SUPPLEMENTARY DATA

Supplementary Figure 1. Insulin administration in the peripartum period

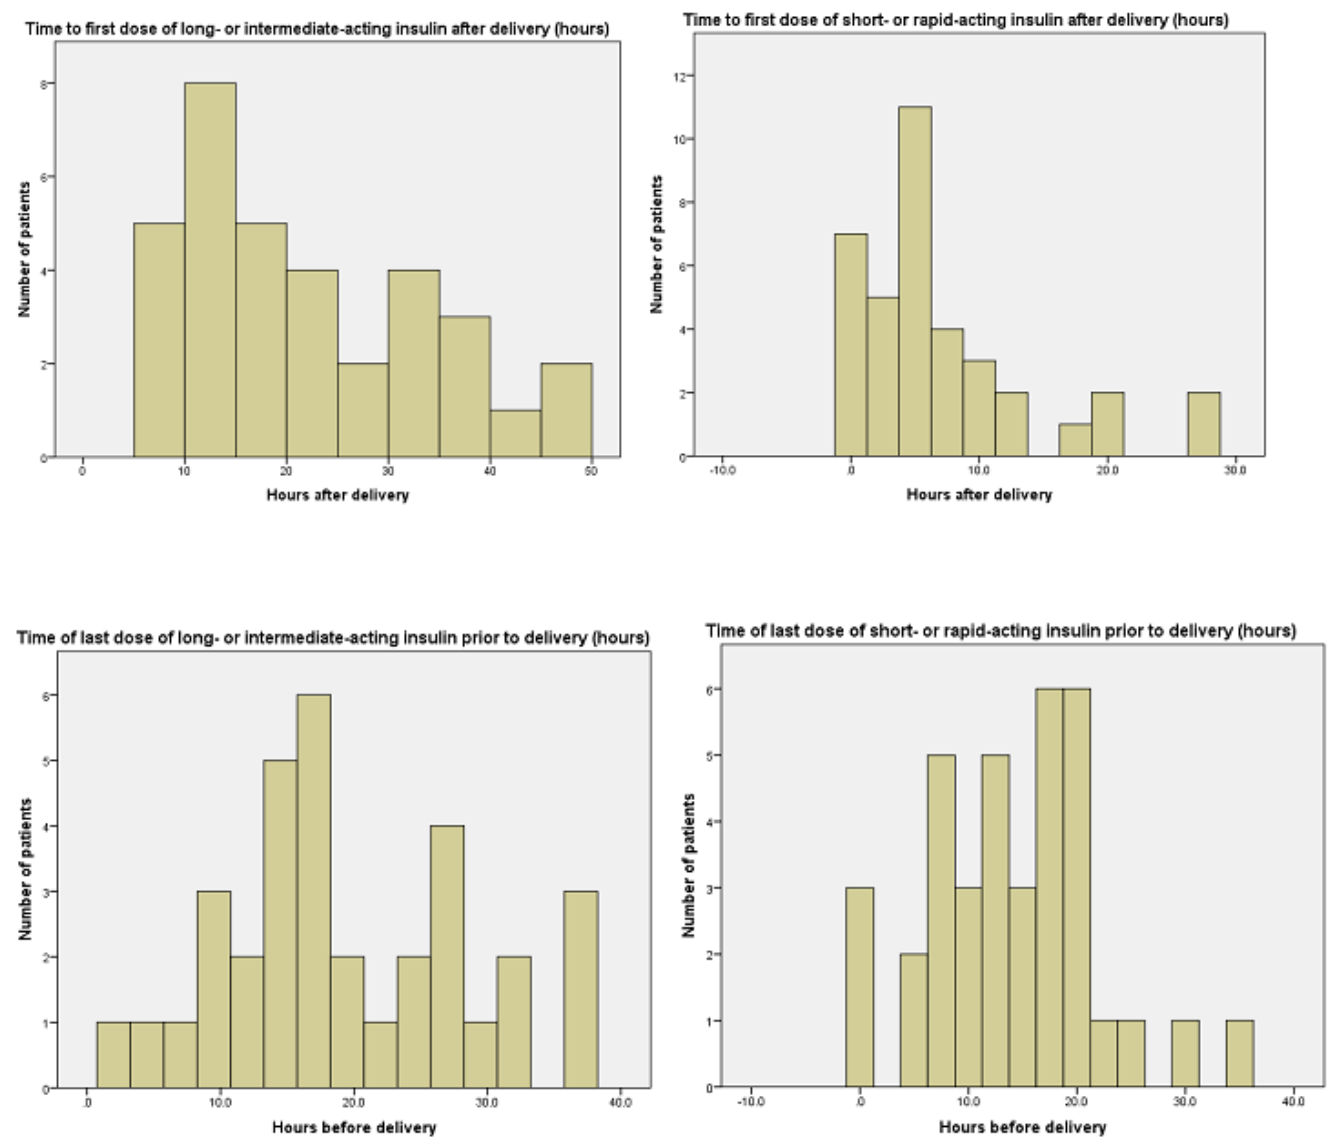

## SUPPLEMENTARY DATA

**Supplementary Figure 2.** Insulin recommencement (as percentage pre-pregnancy requirement)

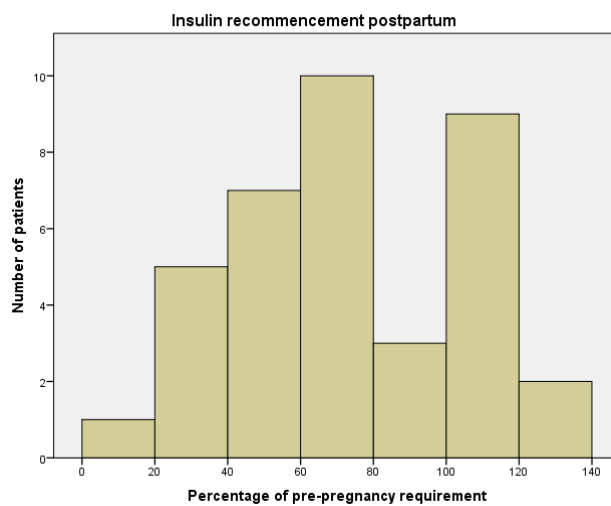

Supplement: dc131348supplementarydata.pdf [file dc131348supplementarydata.pdf]
